# Supplementary material for: Oxygen supply capacity in animals evolves to meet maximum demand at the current oxygen partial pressure regardless of size or temperature
Source: Oxford University Press journal article supplement (doi:10.1242/jeb.210492), 2020-01-01
Supplement: jeb210492supp.pdf [file jeb210492supp.pdf]

**Table S1. Metabolic measurements for diverse species**

| Taxa               | Common name                   | $P_{\text{crit-max}}$<br>Calculated<br>(MMR *<br>$P_{\text{crit}}/\text{BMR}$ ) | $P_{\text{crit-max}}$<br>Measured<br>or Env'n<br>Estimate | $P_{\text{crit}}$<br>(kPa) | BMR<br>( $\mu\text{mol O}_2 \text{ g}^{-1} \text{ h}^{-1}$ ) | MMR<br>( $\mu\text{mol O}_2 \text{ g}^{-1} \text{ h}^{-1}$ ) | MMR=BMR<br>* $P_{\text{crit}}$<br>max/ $P_{\text{crit}}$ | $\alpha$<br>MMR<br>/ $P_{\text{crit}}$<br>max | $\alpha$<br>BMR/<br>$P_{\text{crit}}$ | T °C | References                                                    |
|--------------------|-------------------------------|---------------------------------------------------------------------------------|-----------------------------------------------------------|----------------------------|--------------------------------------------------------------|--------------------------------------------------------------|----------------------------------------------------------|-----------------------------------------------|---------------------------------------|------|---------------------------------------------------------------|
| <b>Mollusca</b>    |                               |                                                                                 |                                                           |                            |                                                              |                                                              |                                                          |                                               |                                       |      |                                                               |
| <b>Cephalopoda</b> |                               |                                                                                 |                                                           |                            |                                                              |                                                              |                                                          |                                               |                                       |      |                                                               |
|                    | <i>Illex illecebrosus</i>     | 19.45                                                                           | 21                                                        | 4.87                       | 13.97                                                        | 55.80                                                        | 60.24                                                    | 2.66                                          | 2.87                                  | 13   | (Birk et al., 2018; Demont and O'Dor, 1984)                   |
|                    | <i>Dosidicus gigas</i>        | 20.13                                                                           | 21                                                        | 4.6                        | 16                                                           | 70.00                                                        | 73.04                                                    | 3.33                                          | 3.48                                  | 25   | (Birk et al., 2018; Rosa and Seibel, 2010)                    |
|                    | <i>Doryteuthis pealei</i>     | 22.80                                                                           | 21                                                        | 3.9                        | 6.5                                                          | 38.00                                                        | 35.00                                                    | 1.81                                          | 1.67                                  | 15   | (Birk et al., 2018; O'Dor and Webber, 1991)                   |
|                    | <i>Doryteuthis opalescens</i> | 18.53                                                                           | 21                                                        | 4.96                       | 10.30                                                        | 38.48                                                        | 43.61                                                    | 1.83                                          | 2.08                                  | 15   | (O'Dor, 1982; Burford et al., 2019)                           |
|                    | <i>Lolliguncula brevis</i>    | 12.63                                                                           | 12.44                                                     | 7.7                        | 23.47                                                        | 38.50                                                        | 37.92                                                    | 3.09                                          | 3.05                                  | 24   | (Wells et al., 1988; Finke et al., 1996; Bartol et al., 2001) |
|                    | <i>Octopus vulgaris</i>       | 19.25                                                                           | 21                                                        | 8                          | 2.36                                                         | 5.68                                                         | 6.20                                                     | 0.27                                          | 0.30                                  | 25   | (Valverde and García, 2005; Wells et al., 1983a,b)            |
|                    | <i>Nautilus pompilius</i>     | 24.69                                                                           | 21                                                        | 6.47                       | 1.09                                                         | 4.16                                                         | 3.54                                                     | 0.20                                          | 0.17                                  | 21   | (O'Dor et al., 1990; Staples et al., 2000)                    |
| <b>Gastropoda</b>  |                               |                                                                                 |                                                           |                            |                                                              |                                                              |                                                          |                                               |                                       |      |                                                               |
|                    | <i>G. gibberulus gibbosus</i> | 16.17                                                                           | 21                                                        | 3.5                        | 4.06                                                         | 18.76                                                        | 24.36                                                    | 0.89                                          | 1.16                                  | 33   | (Lefevre et al., 2015)                                        |
| <b>Bivalvia</b>    |                               |                                                                                 |                                                           |                            |                                                              |                                                              |                                                          |                                               |                                       |      |                                                               |
|                    | <i>Panopea zelandica</i>      | 20.01                                                                           | 21                                                        | 8                          | 6.25                                                         | 15.63                                                        | 16.41                                                    | 0.74                                          | 0.78                                  | 15   | (Le et al., 2016)                                             |
| <b>Arthropoda</b>  |                               |                                                                                 |                                                           |                            |                                                              |                                                              |                                                          |                                               |                                       |      |                                                               |
| <b>Crustacea</b>   |                               |                                                                                 |                                                           |                            |                                                              |                                                              |                                                          |                                               |                                       |      |                                                               |
|                    | <i>Gnathophausia ingens</i>   | 3.01                                                                            | 2.89                                                      | 0.8                        | 1.33                                                         | 5.00                                                         | 4.80                                                     | 1.73                                          | 1.66                                  | 5.5  | (Childress and Seibel, 1998; Cowles and Childress, 1988)      |
|                    | <i>Calinectes sapidus</i>     | 20.73                                                                           | 21                                                        | 7.98                       | 4.2                                                          | 10.91                                                        | 11.05                                                    | 0.52                                          | 0.53                                  | 10   | (Brill et al., 2015; Booth and McMahon, 1992)                 |
|                    | <i>Penaeus monodon</i>        | 22.80                                                                           | 21                                                        | 5.37                       | 4.81                                                         | 20.42                                                        | 18.81                                                    | 0.97                                          | 0.90                                  | 30   | (Ern et al., 2015; Salvato et al., 2001)                      |

| Taxa                          | Common name      | $P_{crit-max}$<br>Calculated<br>(MMR *<br>$P_{crit}/BMR$ ) | $P_{crit-max}$<br>Measured<br>or Env'n<br>Estimate | $P_{crit}$<br>(kPa) | BMR<br>( $\mu\text{mol O}_2 \text{ g}^{-1} \text{ h}^{-1}$ ) | MMR<br>( $\mu\text{mol O}_2 \text{ g}^{-1} \text{ h}^{-1}$ ) | MMR=BMR<br>* $P_{crit}$ -<br>max/ $P_{crit}$ | $\alpha$<br>MMR<br>/ $P_{crit}$ -<br>max | $\alpha$<br>BMR/<br>$P_{crit}$ | T °C | References                                                      |
|-------------------------------|------------------|------------------------------------------------------------|----------------------------------------------------|---------------------|--------------------------------------------------------------|--------------------------------------------------------------|----------------------------------------------|------------------------------------------|--------------------------------|------|-----------------------------------------------------------------|
| <i>Euphausia pacifica</i>     | Pacific Krill    | 17.38                                                      | 21                                                 | 2.38                | 3.57                                                         | 26.07                                                        | 31.50                                        | 1.24                                     | 1.5                            | 10   | (Childress, 1975)                                               |
| <i>Sergestes similis</i>      | Deep shrimp      | 20.74                                                      | 21                                                 | 3.05                | 10                                                           | 68.00                                                        | 68.85                                        | 3.24                                     | 3.28                           | 13   | (Childress, 1975;<br>Cowles, 2001)                              |
| <i>Homarus americanus</i>     | American Lobster | 23.15                                                      | 21                                                 | 4.6                 | 0.93                                                         | 4.68                                                         | 4.25                                         | 0.22                                     | 0.20                           | 15   | (Lyons et al., 2013;<br>McMahon and Wilkens, 1975)              |
| <i>Janus edwardsii</i>        | Rock Lobster     | 23.11                                                      | 21                                                 | 7.66                | 0.72                                                         | 2.16                                                         | 1.97                                         | 0.10                                     | 0.09                           | 13   | (Crear and Forteach, 2000)                                      |
| Insecta                       |                  |                                                            |                                                    |                     |                                                              |                                                              |                                              |                                          |                                |      |                                                                 |
| <i>Schistocerca americana</i> | Grasshopper      | 21.01                                                      | 21                                                 | 5                   | 76.4                                                         | 321.00                                                       | 320.9                                        | 15.3                                     | 15.3                           | 30   | (Kirkton et al., 2005)                                          |
| Chordata - Vertebrata         |                  |                                                            |                                                    |                     |                                                              |                                                              |                                              |                                          |                                |      |                                                                 |
| Teleostei                     |                  |                                                            |                                                    |                     |                                                              |                                                              |                                              |                                          |                                |      |                                                                 |
| <i>Morone saxatilis</i>       | Striped Bass     | 20.81                                                      | 21                                                 | 5.5                 | 2.27                                                         | 8.59                                                         | 8.67                                         | 0.41                                     | 0.41                           | 20   | (Lapointe et al., 2014)                                         |
| <i>Centropristis striata</i>  | Black Sea Bass   | 21.01                                                      | 21                                                 | 4.73                | 2.72                                                         | 12.08                                                        | 12.08                                        | 0.58                                     | 0.58                           | 22   | (Slesinger et al., 2019)                                        |
| <i>Gadus morhua</i>           | Atlantic Cod     | 18.16                                                      | 21                                                 | 6.42                | 2.1                                                          | 5.94                                                         | 6.87                                         | 0.28                                     | 0.33                           | 15   | (Chabot and Claireaux, 2008)                                    |
| <i>Sciaenops ocellatus</i>    | Red Drum         | 14.02                                                      | 15                                                 | 4.2                 | 5.78                                                         | 19.30                                                        | 20.64                                        | 1.29                                     | 1.38                           | 24   | (Ern et al., 2016)                                              |
| <i>Cyclopterus lumpus</i>     | Lumpfish         | 20.53                                                      | 21                                                 | 7.13                | 2.5                                                          | 7.20                                                         | 6.80                                         | 0.37                                     | 0.35                           | 10   | (Ern et al., 2016)                                              |
| <i>Lates calcarifer</i>       | Barramundi       | 21.11                                                      | 21                                                 | 4.42                | 5.81                                                         | 27.75                                                        | 27.60                                        | 1.32                                     | 1.31                           | 29   | (Norin et al., 2014;<br>Collins et al., 2013)                   |
| <i>Solea solea</i>            | Atlantic Sole    | 13.89                                                      | 16.8                                               | 3.57                | 1.28                                                         | 4.98                                                         | 6.02                                         | 0.30                                     | 0.36                           | 20   | (Lefrançois and Claireaux, 2003; Van den Thillart et al., 1994) |
| <i>Scophthalmus maximus</i>   | Turbot           | 20.00                                                      | 21                                                 | 4                   | 1.32                                                         | 6.60                                                         | 6.93                                         | 0.31                                     | 0.33                           | 17   | (Mallekh and Lagardere, 2002; Maxime et al., 2000)              |
| <i>Fundulus heteroclitus</i>  | killifish        | 10.98                                                      | 10.3                                               | 5.2                 | 9                                                            | 19.00                                                        | 17.83                                        | 1.84                                     | 1.73                           | 20   | (Healy and Schulte, 2012; McBryan et al., 2016)                 |
| <i>Chromis atripectoralis</i> | Black-axil       | 22.12                                                      | 21                                                 | 4.31                | 5.15                                                         | 26.43                                                        | 25.09                                        | 1.26                                     | 1.19                           | 31   | (Ern et al., 2017)                                              |
| <i>Myoxocephalus scorpius</i> | Sculpin          | 23.61                                                      | 21                                                 | 7.13                | 1.51                                                         | 5.00                                                         | 4.45                                         | 0.24                                     | 0.21                           | 10   | (Seth et al., 2013;<br>Richards, 2011)                          |

| Taxa                           | Common name            | $P_{crit-max}$<br>Calculated<br>(MMR *<br>$P_{crit}/BMR$ ) | $P_{crit-max}$<br>Measured<br>or Env'n<br>Estimate | $P_{crit}$<br>(kPa) | BMR<br>( $\mu\text{mol O}_2 \text{ g}^{-1} \text{ h}^{-1}$ ) | MMR<br>( $\mu\text{mol O}_2 \text{ g}^{-1} \text{ h}^{-1}$ ) | MMR=BMR<br>* $P_{crit}$<br>max/ $P_{crit}$ | $\alpha$<br>MMR<br>/ $P_{crit}$<br>max | $\alpha$<br>BMR/<br>$P_{crit}$ | T °C | References                                       |
|--------------------------------|------------------------|------------------------------------------------------------|----------------------------------------------------|---------------------|--------------------------------------------------------------|--------------------------------------------------------------|--------------------------------------------|----------------------------------------|--------------------------------|------|--------------------------------------------------|
| <i>Bellapiscis medius</i>      | Intertidal triplefin   | 17.21                                                      | 21                                                 | 2.00                | 2.47                                                         | 21.25                                                        | 25.93                                      | 1.01                                   | 1.24                           | 18   | (McArley et al., 2019)                           |
| <i>Forsterygion lapillum</i>   | Intertidal triplefin   | 17.69                                                      | 21                                                 | 3.00                | 3.13                                                         | 18.43                                                        | 21.91                                      | 0.88                                   | 1.04                           | 18   | (McArley et al., 2019)                           |
| <i>Forsterygion varium</i>     | Subtidal triplefin     | 18.11                                                      | 21                                                 | 3.70                | 3.00                                                         | 14.66                                                        | 17.03                                      | 0.66                                   | 0.81                           | 18   | (McArley et al., 2019)                           |
| <i>Forsterygion malcolmi</i>   | Subtidal triplefin     | 17.98                                                      | 21                                                 | 4.70                | 3.43                                                         | 13.13                                                        | 15.32                                      | 0.63                                   | 0.73                           | 18   | (McArley et al., 2019)                           |
| <i>Argyrosomus japonicus</i>   | Mulloway               | 19.19                                                      | 21                                                 | 2.63                | 1.56                                                         | 11.41                                                        | 12.48                                      | 0.54                                   | 0.59                           | 22   | (Fitzgibbon et al., 2007)                        |
| <i>Limanda limanda</i>         | Common Dab             | 24.09                                                      | 21                                                 | 5.46                | 1.6                                                          | 7.06                                                         | 6.15                                       | 0.34                                   | 0.29                           | 15   | (Duthie, 1982)                                   |
| <i>Dicentrarchus labrax</i>    | European Bass          | 18.58                                                      | 21                                                 | 4.46                | 1.68                                                         | 7.00                                                         | 7.91                                       | 0.33                                   | 0.38                           | 11   | (Claireaux and Lagardère, 1999)                  |
| <i>Onchorynchus mykiss</i>     | Trout                  | 19.17                                                      | 21                                                 | 3.15                | 1.54                                                         | 9.37                                                         | 10.27                                      | 0.45                                   | 0.49                           | 7.4  | (Claireaux et al., 2006)<br>(Zhang et al., 2018) |
| <i>Carassius auratus</i>       | Goldfish               | 4.69                                                       | 3.96                                               | 2.49                | 3.79                                                         | 7.14                                                         | 7.15                                       | 1.87                                   | 1.52                           | 20   | (Fry and Hart, 1948)                             |
| <i>Chitala ornata</i>          | Clown<br>knifefish     | 21.02                                                      | 21                                                 | 8.7                 | 2.91                                                         | 7.03                                                         | 7.02                                       | 0.33                                   | 0.33                           | 33   | (Tuong et al., 2018)                             |
| <i>Ambloplites rupestris</i>   | Rock Bass              | 8.10                                                       | 12.42                                              | 2.31                | 1.86                                                         | 6.76                                                         | 10.00                                      | 0.61                                   | 0.81                           | 15   | (Crans et al., 2015)                             |
| <i>Lepomis gibbosus</i>        | Pumpkinseed<br>sunfish | 11.54                                                      | 11.40                                              | 4.01                | 2.55                                                         | 7.33                                                         | 7.25                                       | 0.67                                   | 0.63                           | 15   | (Crans et al., 2015)                             |
| <i>Lepomis macrochirus</i>     | Bluegill               | 10.20                                                      | 9.61                                               | 3.63                | 2.48                                                         | 6.97                                                         | 6.57                                       | 0.63                                   | 0.68                           | 15   | (Crans et al., 2015)                             |
| <i>Micropterus salmoides</i>   | Largemouth<br>Bass     | 12.73                                                      | 12.39                                              | 4.34                | 2.69                                                         | 7.89                                                         | 7.68                                       | 0.72                                   | 0.61                           | 15   | (Crans et al., 2015)                             |
| <i>Salmo salar</i>             | Atlantic<br>Salmon     | 21.08                                                      | 21                                                 | 11.55               | 13.68                                                        | 24.97                                                        | 24.87                                      | 1.18                                   | 1.18                           | 16   | (Oldham et al., 2019)                            |
| <i>Micropogonias undulatus</i> | Atlantic<br>Croaker    | 13.83                                                      | 13.0                                               | 5.6                 | 3.93                                                         | 9.70                                                         | 9.12                                       | 0.70                                   | 0.70                           | 25   | (Marcek et al., 2019)                            |
| <i>Leiostomus xanthurus</i>    | Spot                   | 10.47                                                      | 10.0                                               | 5.6                 | 6.69                                                         | 12.50                                                        | 11.92                                      | 1.19                                   | 1.19                           | 25   | (Marcek et al., 2019)                            |
| Elasmobranchii                 |                        |                                                            |                                                    |                     |                                                              |                                                              |                                            |                                        |                                |      |                                                  |
| <i>Carcharhinus</i>            | Sandbar Shark          | 18.78                                                      | 21                                                 | 10                  | 5.16                                                         | 9.69                                                         | 10.84                                      | 0.46                                   | 0.52                           | 28   | (Crear et al., 2019)                             |

| Taxa            | Common name                       | $P_{\text{crit-max}}$<br>Calculated<br>(MMR *<br>$P_{\text{crit}}/\text{BMR}$ ) | $P_{\text{crit-max}}$<br>Measured<br>or Env'n<br>Estimate | $P_{\text{crit}}$<br>(kPa) | BMR<br>( $\mu\text{mol O}_2 \text{ g}^{-1} \text{ h}^{-1}$ ) | MMR<br>( $\mu\text{mol O}_2 \text{ g}^{-1} \text{ h}^{-1}$ ) | MMR=BMR<br>* $P_{\text{crit}}$<br>max/ $P_{\text{crit}}$ | $\alpha$<br>MMR<br>/ $P_{\text{crit}}$<br>max | $\alpha$<br>BMR/<br>$P_{\text{crit}}$ | T °C | References |                                                       |
|-----------------|-----------------------------------|---------------------------------------------------------------------------------|-----------------------------------------------------------|----------------------------|--------------------------------------------------------------|--------------------------------------------------------------|----------------------------------------------------------|-----------------------------------------------|---------------------------------------|------|------------|-------------------------------------------------------|
| <i>plumbeus</i> |                                   |                                                                                 |                                                           |                            |                                                              |                                                              |                                                          |                                               |                                       |      |            |                                                       |
| Reptilia        |                                   |                                                                                 |                                                           |                            |                                                              |                                                              |                                                          |                                               |                                       |      |            |                                                       |
|                 | <i>Alligator mississippiensis</i> | Alligator                                                                       | 22.00                                                     | 21                         | 5                                                            | 6.7                                                          | 29.48                                                    | 28.14                                         | 1.40                                  | 1.34 | 15         | (Gangloff and Telemeco, 2018; Lewis and Gatten, 1985) |
| Mammalia        |                                   |                                                                                 |                                                           |                            |                                                              |                                                              |                                                          |                                               |                                       |      |            |                                                       |
|                 | <i>Spalax ehrenbergi</i>          | Mole Rat                                                                        | 12.69                                                     | 11                         | 4.56                                                         | 42.4                                                         | 118                                                      | 111.6                                         | 10.73                                 | 9.30 | 30         | (Arieli et al., 1977)                                 |
|                 | <i>Rattus norvegicus</i>          | Lab rat                                                                         | 21.88                                                     | 21                         | 6.08                                                         | 42.4                                                         | 152.6                                                    | 146.5                                         | 7.27                                  | 6.97 | 37         | (Arieli et al., 1977)                                 |
|                 | <i>Homo sapiens</i>               | Human                                                                           | 22.40                                                     | 21                         | 5.6                                                          | 33.2                                                         | 133                                                      | 145.6                                         | 6.33                                  | 5.93 | 37         | (Berger and Grocott, 2017; Day et al., 2003)          |
|                 | <i>Thomomys bottae</i>            | Pocket gopher                                                                   | 21.00                                                     | 21                         | 12.5                                                         | 89                                                           | 149.50                                                   | 149.5                                         | 7.12                                  | 7.12 | 37         | (Lechner, 1977)                                       |
|                 | <i>T. umbrinus melanotis</i>      | Altitude gopher                                                                 | 14.95                                                     | 15.4                       | 8.9                                                          | 89                                                           | 149.50                                                   | 154.0                                         | 9.71                                  | 10.0 | 37         | (Lechner, 1977)                                       |

\*Calculations requiring  $P_{\text{crit-max}}$  (MMR and  $\alpha$ ) use the measured value or estimated environmental  $P_{\text{O}_2}$ . For hypoxic species, those values are listed in Table 2.

**Table S2.  $P_{crit-max}$  and environmental  $P_{O_2}$  ( $P_{O_{2env}}$ ) in diverse hypoxic species**

| Species                        | Predicted $P_{rit-max}$ (kPa) = $\frac{MMR * P_{crit}}{BMR}$ | $P_{O_{2env}}$ or measured $P_{crit-max}$ | Description of $P_{O_{2env}}$                                                                                                     | Ref                             |
|--------------------------------|--------------------------------------------------------------|-------------------------------------------|-----------------------------------------------------------------------------------------------------------------------------------|---------------------------------|
| <i>Lolliguncula brevis</i>     | 12.63                                                        | 12.44                                     | Summer $P_{O_2}$ in Chesapeake Bay when squids are present (4 mg l <sup>-1</sup> at 26°C).                                        | (Bartol et al., 2002)           |
| <i>Gnathopausia ingens</i>     | 3.01                                                         | 2.89                                      | $P_{crit-max}$ is 2.89 kPa (0.95 ml l <sup>-1</sup> at 5.5°C), ~ $P_{O_2}$ maximum in California Current between 400-800 m depth. | (Childress and Seibel, 1998)    |
| <i>Sciaenops ocellatus</i>     | 14-15.48                                                     | 15                                        | $P_{O_2}$ high of 15 kPa (5 mg at 20°C) in estuarine habitat.                                                                     | (Stunz et al., 2002)            |
| <i>Solea solea</i>             | 13.89                                                        | 16.8                                      | $P_{crit-max}$ is 16.8 kPa. Bottom waters of the Adriatic Sea are hypoxic but a precise figure could not be determined.           | (Van den Thillart et al., 1994) |
| <i>Fundulus heteroclitus</i>   | 10.98                                                        | 10.3                                      | $P_{O_2}$ range day to night is ~6.7 to 10.3 kPa                                                                                  | (Cochran and Burnett, 1996)     |
| <i>Carassius auratus</i>       | 4.69                                                         | 3.96                                      | $P_{crit-max}$ (20°C) is 3.96 kPa (Incipient lethal oxygen level). Goldfish ponds are hypoxic but highly variable.                | (Fry and Hart, 1948)            |
| <i>Ambloplites rupestri</i>    | 8.40                                                         | 12.42                                     | $P_{crit-max}$ estimated based on MMR measurements at 6, 9 and 20 kPa.                                                            | (Crans et al., 2015)            |
| <i>Lepomis gibbosus</i>        | 11.54                                                        | 11.40                                     | $P_{crit-max}$ estimated based on MMR measurements at 6, 9 and 20 kPa.                                                            | (Crans et al., 2015)            |
| <i>Lepomis macrochirus</i>     | 10.20                                                        | 9.61                                      | $P_{crit-max}$ estimates based on MMR measurements at 6, 9 and 20 kPa.                                                            | (Crans et al., 2015)            |
| <i>Micropterus salmoides</i>   | 12.73                                                        | 12.39                                     | $P_{crit-max}$ estimates based on MMR measurements at 6, 9 and 20 kPa.                                                            | (Crans et al., 2015)            |
| <i>Spalax ehrenbergi</i>       | 12.69                                                        | 11                                        | 11 kPa is ~ $P_{crit}$ for MMR. Mole rats inhabit hypoxic subterranean burrows.                                                   | (Arieli et al., 1977)           |
| <i>T. umbrinus melanotis</i>   | 14.95                                                        | 15.4                                      | Collected at 3200 m=15.4 kPa. Measured $P_{crit-max}$ is 14.95.                                                                   | (Lechner, 1977)                 |
| <i>Micropogonias undulatus</i> | 13.83                                                        | 13                                        | Estuarine habitat ~60% Saturation                                                                                                 | (Craig and Crowder, 2005)       |
| <i>Leiostomus xanthurus</i>    | 10.47                                                        | 10                                        | Estuarine habitat                                                                                                                 | (Ross et al., 2001)             |

**Table S3. Temperature effects on metabolic rate and critical oxygen pressures**

| Species                       | T°<br>C | P <sub>crit</sub><br>-max | BMR  | P <sub>crit</sub> | MM<br>R | E (eV)                   |     |                   |                    | References                                                   |
|-------------------------------|---------|---------------------------|------|-------------------|---------|--------------------------|-----|-------------------|--------------------|--------------------------------------------------------------|
|                               |         |                           |      |                   |         | BM<br>R                  | MMR | P <sub>crit</sub> | P <sub>c-max</sub> |                                                              |
| <i>Morone saxatilis</i>       | 20      | 19.9                      | 2.27 | 5.5               | 8.59    | 0.80=0.38+0.39-0.0=0.77  |     |                   |                    | (Lapointe et al., 2014)                                      |
|                               | 26      | 20.1                      | 4.28 | 7.43              | 11.72   |                          |     |                   |                    |                                                              |
| <i>Centropristis striata</i>  | 12      | 23.0                      | 1.31 | 3.36              | 8.95    | 0.54=0.27+0.25-0.0=0.52  |     |                   |                    | (Slesinger et al., 2019)                                     |
|                               | 17      | 23.6                      | 1.89 | 3.99              | 11.19   |                          |     |                   |                    |                                                              |
|                               | 22      | 21.0                      | 2.72 | 4.73              | 12.08   |                          |     |                   |                    |                                                              |
|                               | 24      | 23.2                      | 3.15 | 5.07              | 14.44   |                          |     |                   |                    |                                                              |
|                               | 27      | 22.3                      | 3.93 | 5.62              | 15.56   |                          |     |                   |                    |                                                              |
| <i>Gadus morhua</i>           | 30      | 14.2                      | 4.89 | 6.23              | 11.12   |                          |     |                   |                    | (Schurmann and Steffenson, 1997; Chabot and Claireaux, 2008) |
|                               | 18      | 18.8                      | 3.84 | 6.42              | 11.24   | 0.71=0.39+0.34-0.0=0.73  |     |                   |                    |                                                              |
|                               | 5       | 18.2                      | 0.9  | 3.49              | 4.69    |                          |     |                   |                    |                                                              |
|                               | 10      | 17.5                      | 1.66 | 4.91              | 5.9     |                          |     |                   |                    |                                                              |
|                               | 15      | 18.2                      | 2.1  | 6.42              | 5.94    |                          |     |                   |                    |                                                              |
| <i>Sciaenops ocellatus</i>    | 2       | 15.5                      | 0.75 | 3.2               | 3.63    |                          |     |                   |                    | (Ern et al., 2016)                                           |
|                               | 24      | 14.0                      | 5.78 | 4.2               | 19.30   | 0.43=0.32+0.24-0.05=0.51 |     |                   |                    |                                                              |
| <i>Cyclopterus lumpus</i>     | 30      | 15.4                      | 8.09 | 5.05              | 24.80   |                          |     |                   |                    | (Ern et al., 2016)                                           |
|                               | 10      | 20.5                      | 2.5  | 7.13              | 7.20    | 0.42=0.25+0.26-0.03=0.48 |     |                   |                    |                                                              |
| <i>Chromis atripectoralis</i> | 16      | 22.2                      | 3.57 | 8.83              | 9.00    |                          |     |                   |                    | (Ern et al., 2017)                                           |
|                               | 35      | 17.6                      | 7.56 | 4.88              | 27.21   | 1.10=0.20+0.75+0.06=1.01 |     |                   |                    |                                                              |
|                               | 33      | 22.6                      | 5.72 | 4.8               | 26.94   |                          |     |                   |                    |                                                              |
|                               | 31      | 22.1                      | 5.15 | 4.31              | 26.43   |                          |     |                   |                    |                                                              |
| <i>Carassius auratus</i>      | 29      | 24.9                      | 3.21 | 3.29              | 24.34   |                          |     |                   |                    | (Fry and Hart, 1948)                                         |
|                               | 5       | 2.5                       | 0.36 | 0.52              | 1.56    | 1.00=0.71+0.54-0.16=1.09 |     |                   |                    |                                                              |
|                               | 10      | 2.2                       | 1.07 | 1.05              | 2.67    |                          |     |                   |                    |                                                              |
|                               | 15      | 3.0                       | 2.23 | 1.32              | 5.13    |                          |     |                   |                    |                                                              |
|                               | 20      | 4.6                       | 3.79 | 2.49              | 7.14    |                          |     |                   |                    |                                                              |
|                               | 25      | 4.1                       | 6.25 | 2.24              | 11.60   |                          |     |                   |                    |                                                              |
|                               | 35      | 4.3                       | 10   | 3.3               | 13.10   |                          |     |                   |                    |                                                              |

| Species                           | T°<br>C | $P_{crit}$<br>-max | BMR   | $P_{crit}$ | MM<br>R | $E$ (eV)                           |     |            |             | References                                             |
|-----------------------------------|---------|--------------------|-------|------------|---------|------------------------------------|-----|------------|-------------|--------------------------------------------------------|
|                                   |         |                    |       |            |         | BM<br>R                            | MMR | $P_{crit}$ | $P_{c-max}$ |                                                        |
| <i>Salmo salar</i>                | 18      | 21.9               | 6.37  | 7.56       | 18.44   | 0.33=0.021+0.19+0.07= <b>0.28</b>  |     |            |             | (Barnes et al., 2011; Hvas et al., 2017)               |
|                                   | 22      | 19.6               | 9.17  | 9.45       | 19.06   |                                    |     |            |             |                                                        |
| <i>Alligator mississippiensis</i> | 15      | 22.6               | 6.70  | 5.0        | 29.48   | 0.40=0.19+0.14+0.01= <b>0.34</b>   |     |            |             | (Gangloff and Telemeco, 2018) (Lewis and Gatten, 1985) |
|                                   | 25      | 21.5               | 26.70 | 7.0        | 80.10   |                                    |     |            |             |                                                        |
| <i>Leiostomus xanthurus</i>       | 10      | 8.23               | 2.19  | 5.77       | 3.13    | 0.46=0.59+0.037-0.171= <b>0.46</b> |     |            |             | (Marcek et al., 2019)                                  |
|                                   | 15      | 8.47               | 3.59  | 4.87       | 6.25    |                                    |     |            |             |                                                        |
|                                   | 20      | 8.45               | 4.81  | 4.82       | 8.44    |                                    |     |            |             |                                                        |
|                                   | 25      | 10.5               | 6.69  | 5.6        | 12.50   |                                    |     |            |             |                                                        |
|                                   | 30      | 13.3               | 7.59  | 6.13       | 16.44   |                                    |     |            |             |                                                        |
| <i>Micropogonias undulatus</i>    | 10      | 11.5               | 1.57  | 5.77       | 3.13    | 0.37=0.49+0.028-0.144= <b>0.37</b> |     |            |             | (Marcek et al., 2019)                                  |
|                                   | 15      | 10.4               | 2.34  | 5.13       | 4.73    |                                    |     |            |             |                                                        |
|                                   | 20      | 8.47               | 2.76  | 3.68       | 6.34    |                                    |     |            |             |                                                        |
|                                   | 25      | 13.8               | 3.93  | 5.6        | 9.70    |                                    |     |            |             |                                                        |
|                                   | 30      | 16.4               | 4.28  | 6.13       | 11.47   |                                    |     |            |             |                                                        |

Basal (BMR) and maximum (MMR) metabolic rates in  $\mu\text{mol O}_2 \text{g}^{-1} \text{h}^{-1}$  and the critical  $P_{\text{O}_2}$  ( $P_{crit}$ ) in kPa. Temperature coefficients ( $E$ ) for metrics ( $Y=\text{BMR}$ ,  $P_{crit}$  or MMR). The temperature coefficient is the slope of the relationship between  $\ln Y$  and  $1/k_B T$ ;  $Y=\exp(-E/1k_B T)$ ,  $T$  in °Kelvin and  $k_B$  is the Boltzmann constant), calculated within the tolerated temperature range for each species (excluded temperatures in red). Calculated  $EP_{crit-max}$  is near zero for all species in this table except freshwater fishes that experience seasonally correlated changes in oxygen and temperature. Estimated  $P_{crit-max}$  values for *C. auratus* are very similar to those directly measured (Fry and Hart, 1948). As described above,  $E_{BMR}=E_{MMR}+E_{Pcrit}-E_{Pcrit-max}$ .
